# Supplementary material
Source: publisher figshare collection journal article supplement (https://acs.figshare.com/ndownloader/files/4733914)

**Supporting Information for**  
**Electrode Kinetic Studies of the Hydroquinone-Benzoquinone System**  
**and the Reaction between Hydroquinone and Ammonia in Propylene**  
**Carbonate: Application to the Indirect Electro-analytical Sensing of**  
**Ammonia**

*Xiaobo Ji, Craig E. Banks, Debbie S. Silvester, Andrew J. Wain,  
and Richard G. Compton\**

Physical and Theoretical Chemistry Laboratory,  
Oxford University, South Parks Road,  
Oxford OX1 3QZ, United Kingdom

***To be submitted: J. Phys. Chem. B***

---

\* To whom correspondence should be addressed.  
Email: Richard.Compton@chemistry.oxford.ac.uk  
Direct Tel: 01865 275413; Fax : 01865 275410

## Figure Legend

### Figure I

Schematic diagram of the tubular flow cell, showing the relative position of electrode within the ESR cavity.

### Figure II

(a) Comparisons of the oxidation peak current and the reduction current of 0.5mM hydroquinone in 0.1M TBAP with PC between experimental results and simulation data at various scan rates. (b, c) Comparisons of the redox peak potentials between experimental results and simulation data at various scan rates.

### Figure III

Steady state voltamogram of 5.0 mM benzoquinone ( $10 \text{ mVs}^{-1}$ ) in PC with 0.1M TBAP obtained at a  $25 \mu\text{m}$  platinum microdisk. The inset figure is the experimental (—) and fitted theoretical ( $\circ$ ) chronoamperometric transient following a potential step from 0 V to -0.8 V.

### Figure IV

ESR spectra for 2mM benzoquinone in PC with 0.1M TBAP observed during in situ electrolysis using a modulation width of 0.24 mT. The inset Figure is steady state voltammetric response ( $10\text{mVs}^{-1}$ ) obtained from a gold tube working electrode.

### Figure V

(a) Plot of limiting current against flow rate ( $V_f$ ) for 2 mM benzoquinone at two different step potentials: -0.6 V ( $\blacktriangle$ ) and -1.4 V ( $\bullet$ ). (b) Log-log plots of current

normalized ESR signal ( $S/i_{lim}$ ) as a function of flow rate ( $V_f$ ) for 2 mM benzoquinone at two different step potentials: -0.6 V (●) and -1.4 V (■).

#### **Figure VI**

Nicholson plot of  $\psi$  versus the square root of various scan rates for the 1.0 mM Benzoquinone in propylene carbonate with 0.1M TBAP.

#### **Figure VII**

(a) Plots comparing peak currents for the experimental CVs represented in Figure (11) to those simulated with Digisim. (b) Plots comparing peak potential separations for the experimental CVs represented in Figure (11) to those simulated with Digisim.

#### **Figure VIII**

The experiment set-up for ammonia determination.

**Figure I**

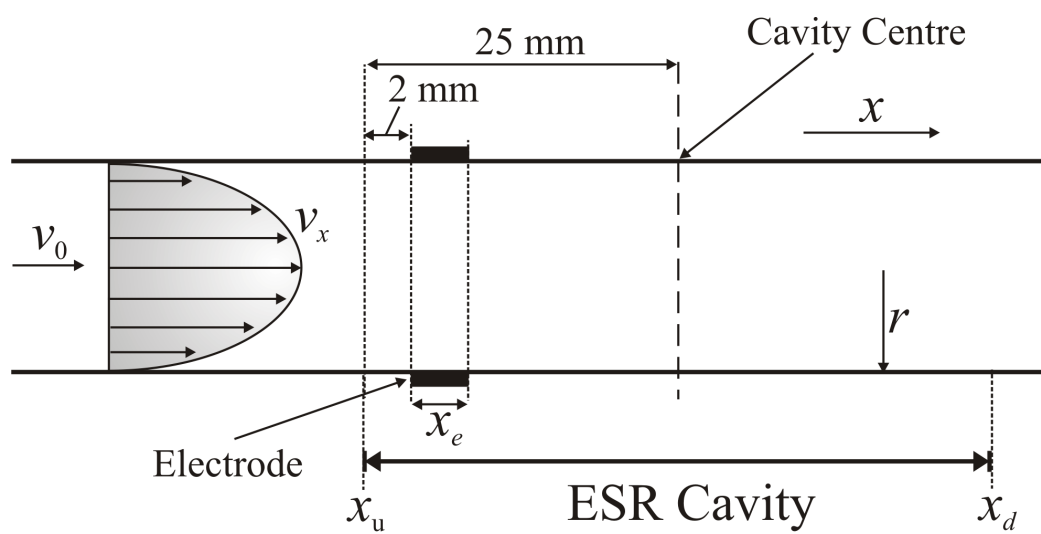

**Figure II**

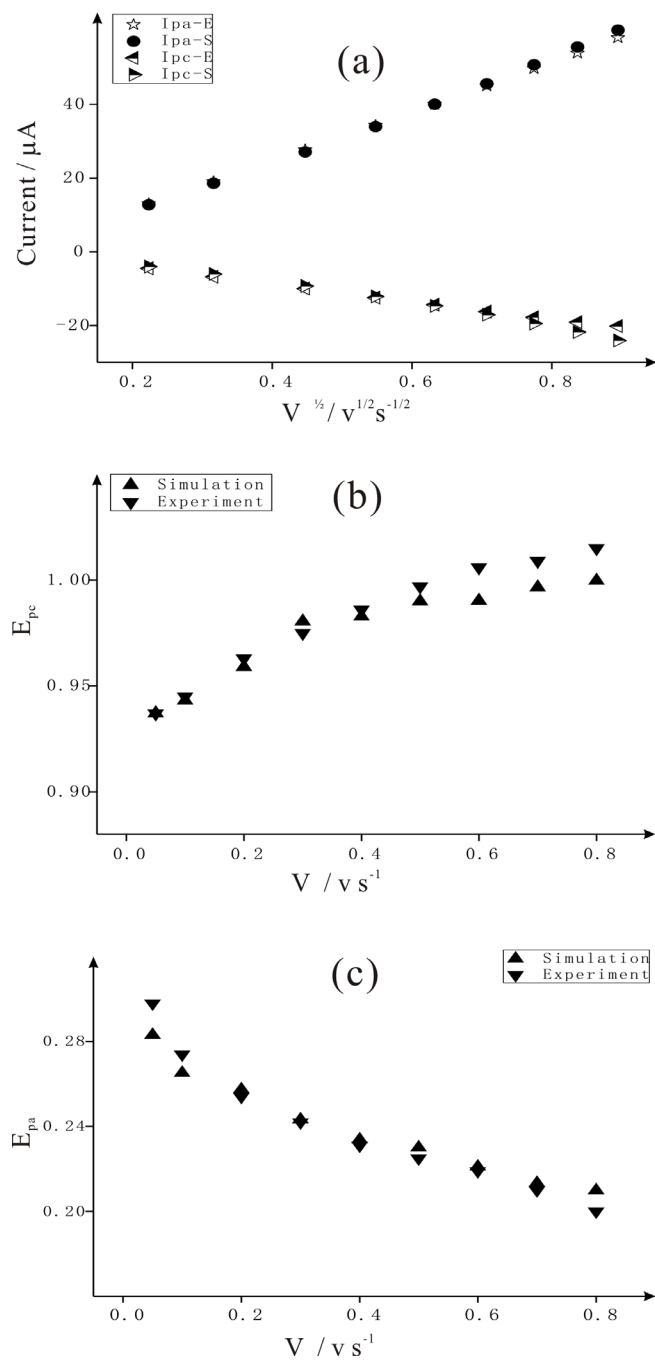

**Figure III**

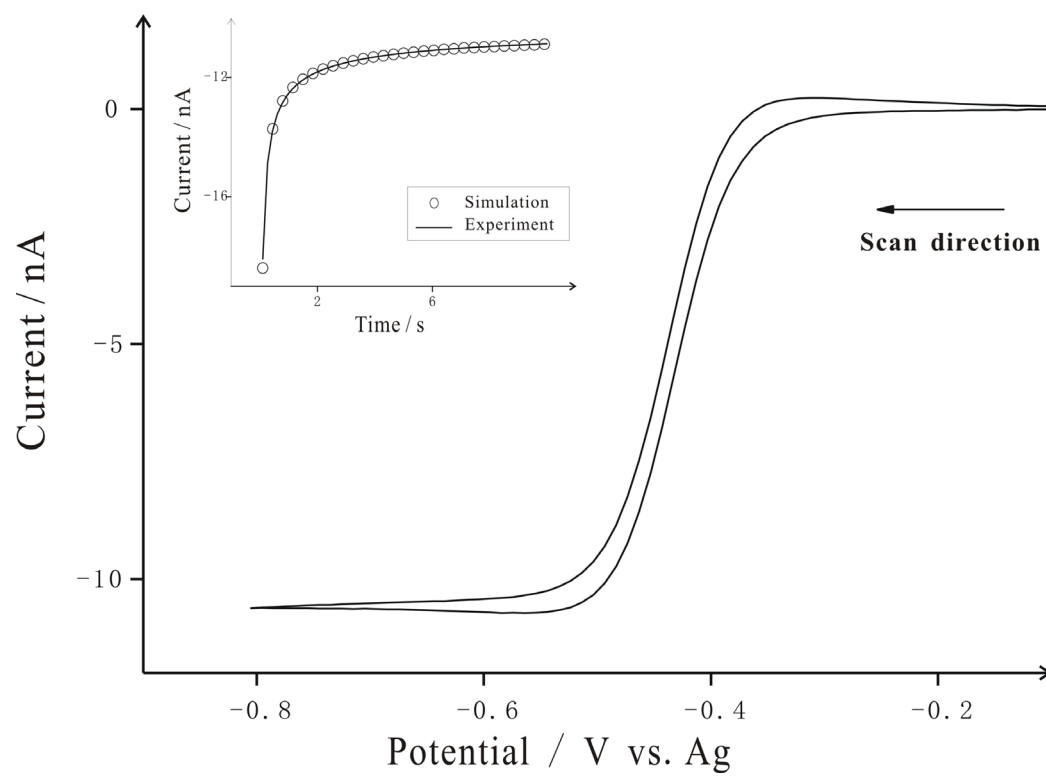

**Figure IV**

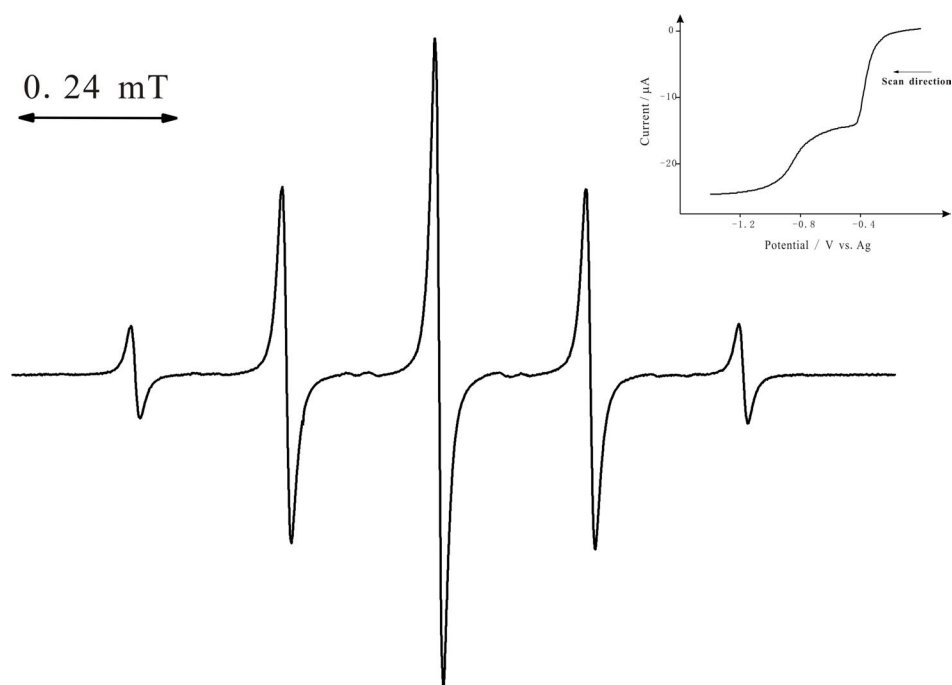

**Figure V**

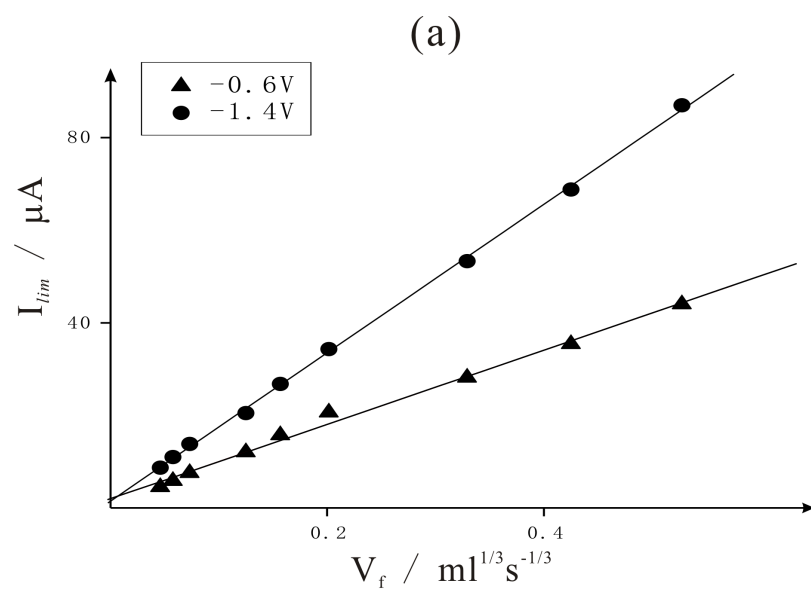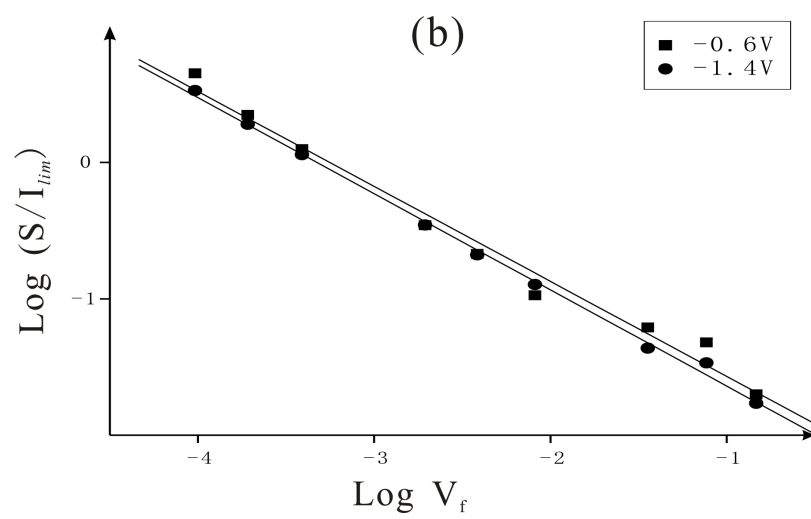



**Figure VI**

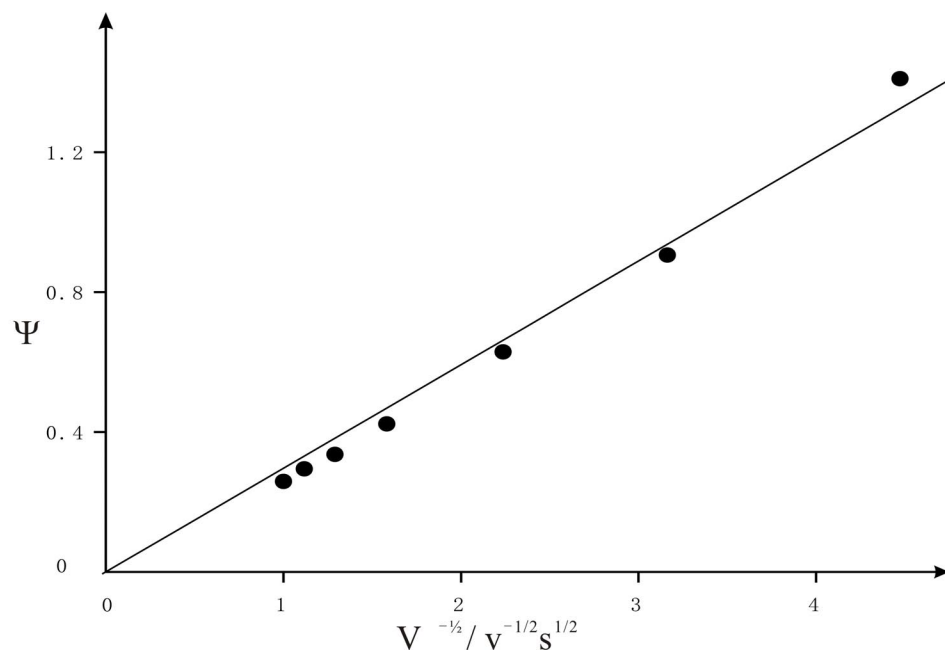

Figure VII

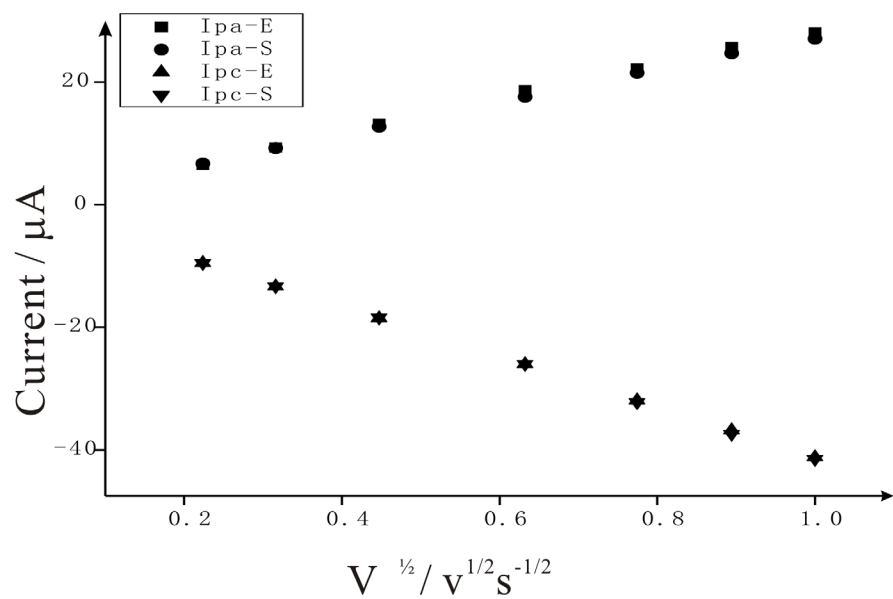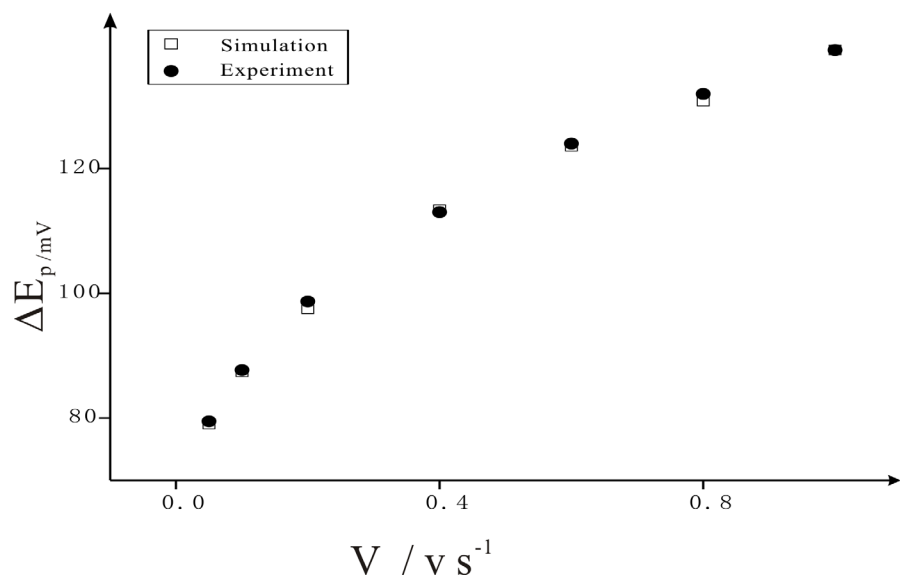

**Figure VIII**

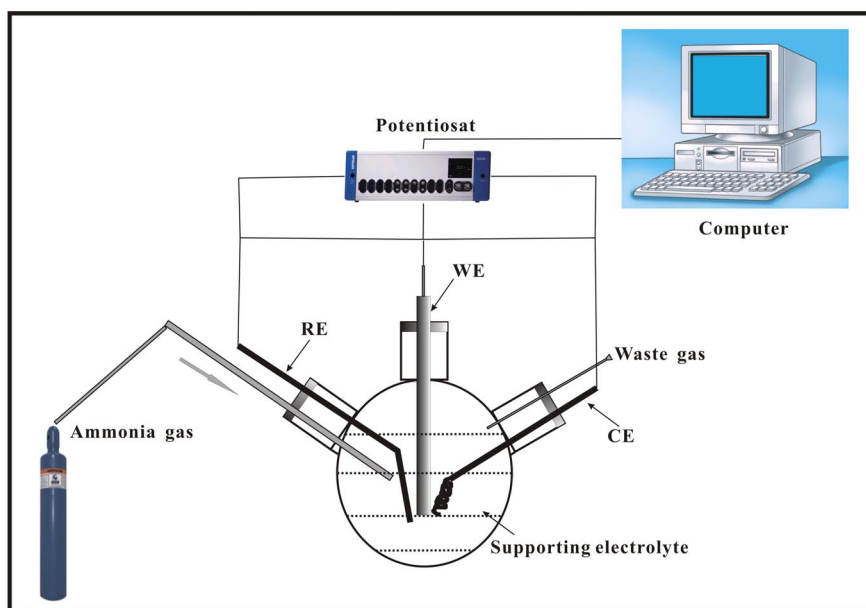

Supplement: Supplementary file 1 [file 4733914]
